# Supplementary material for: High selectivity of sulfur-doped SnO2 in NO2 detection at lower operating temperatures
Source: Royal Society of Chemistry journal article supplement (doi:10.1039/c8nr05649h), 2018-01-01
Supplement: c8nr05649h1.pdf [file c8nr05649h1.pdf]

## Supporting Information

# High Selectivity of Sulfur Doped SnO<sub>2</sub> in NO<sub>2</sub> Detection at Lower Operating Temperature

Keng Xu<sup>\*a</sup>, Shouqin Tian<sup>b</sup>, Jia Zhu<sup>\*c</sup>, Yong Yang<sup>a</sup>, Jing Shi<sup>d</sup>, Ting Yu<sup>a</sup>, Cailei Yuan<sup>\*a</sup>

<sup>a</sup>Jiangxi Key Laboratory of Nanomaterials and Sensors, Jiangxi Key Laboratory of Photoelectronics and Telecommunication, School of Physics, Communication and Electronics, Jiangxi Normal University, Nanchang 330022, Jiangxi, P.R. China

<sup>b</sup>State Key Laboratory of Silicate Materials for Architectures, Wuhan University of Technology, No. 122, Luoshirong Road, Wuhan 430070, China

<sup>c</sup>College of Chemistry and Chemical Engineering, Jiangxi Normal University, Nanchang 330022, Jiangxi, P.R. China

<sup>d</sup>School of Physics, Communication and Electronics, Jiangxi Normal University, Nanchang 330022, Jiangxi, P.R. China

Corresponding Author. [Tel:0791-88120370](tel:0791-88120370);

Email address: [xukeng@163.com](mailto:xukeng@163.com)

## EXPERIMENTAL SECTION

Homogenous slurry was formed by adding 5 mg SnO<sub>2</sub>-400 in 1 ml ethanol by ultrasonication (30 min). Then SnO<sub>2</sub>-400 film was obtained by dropping this slurry on the surface of glassy carbon electrode (diameter 3 mm). The electrochemical characteristics were tested on CHI 660E electrochemical workstation (Chenghua instrument, Shanghai, China) in a three-electrode electrochemical cell with a Pt plate electrode and a saturated calomel electrode. Here, 0.1 M Na<sub>2</sub>SO<sub>4</sub> aqueous solution was served as supporting electrolyte solution. The Mott-Schottky curve was obtained by the potential-impedance method, with a frequency of 1000 Hz, an amplitude of 5 mV, and a potential interval of 50 mV. The potential was tested from -0.8V to 0.5V.

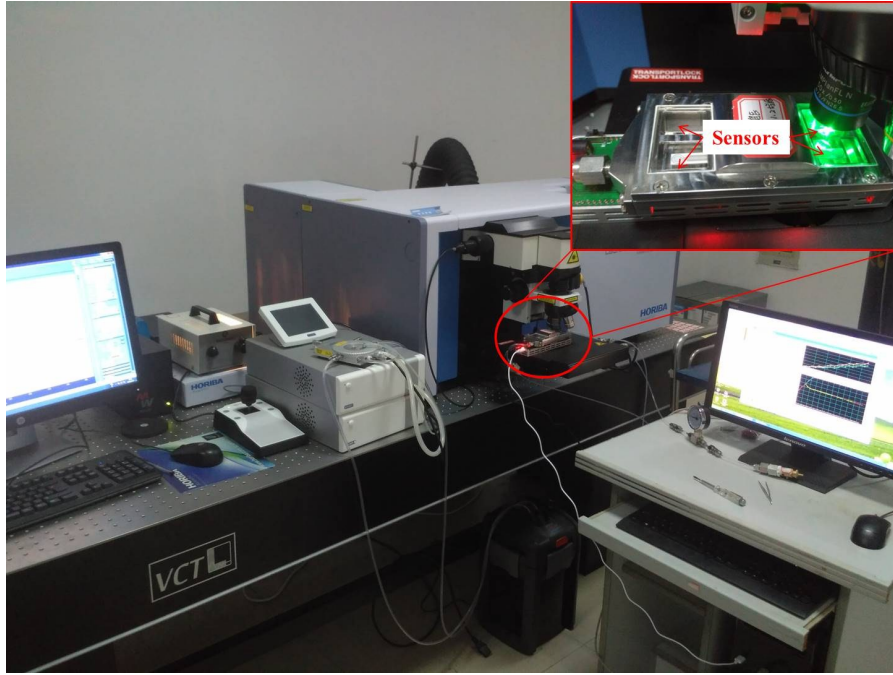

**Figure S1** The image of in-situ Raman instrument.

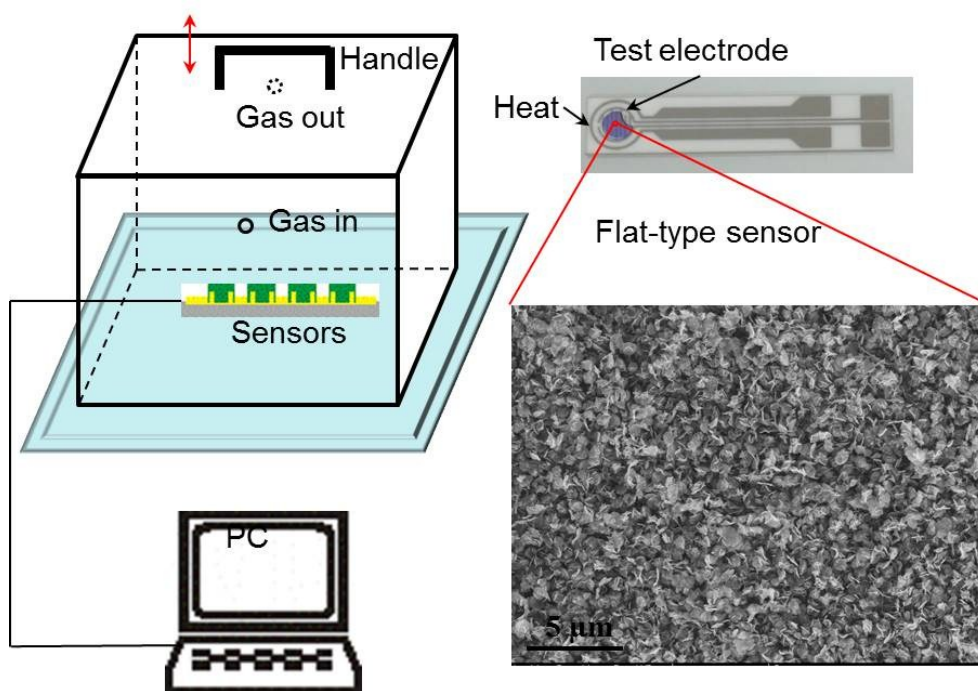

**Figure S2** Schematic diagram of the gas-sensing measurement system (left). The right is the structure of the sensor and the morphology of sensing material (SnO<sub>2</sub>-400) on the surface of sensor.

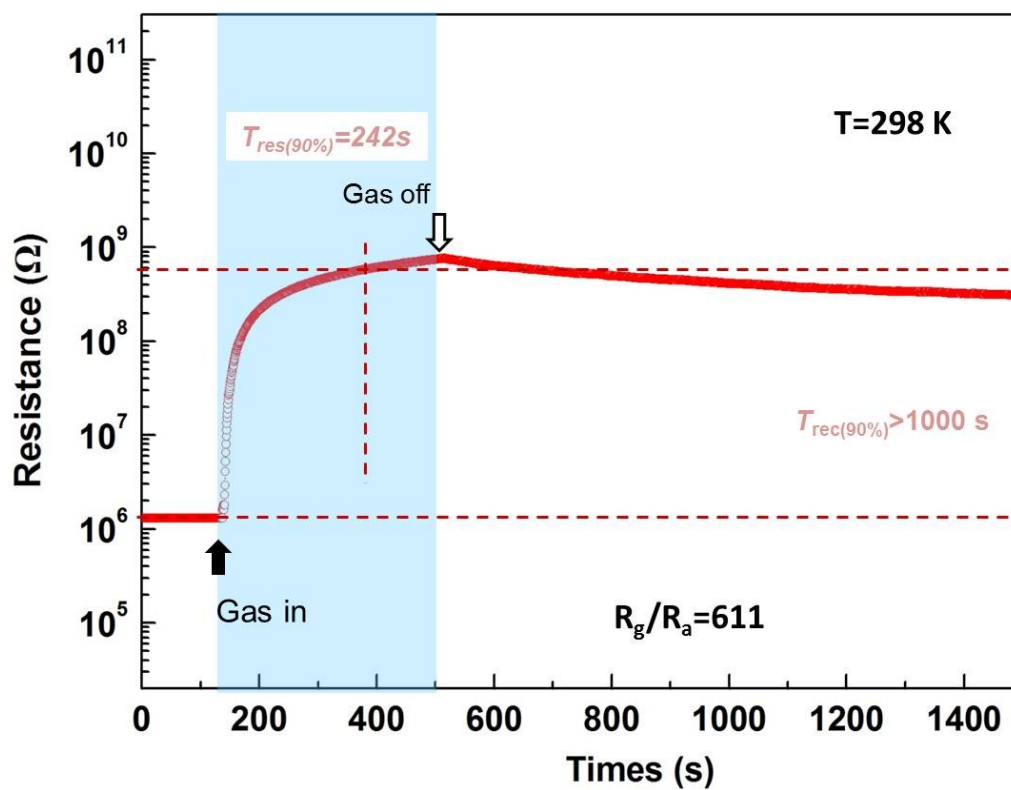

**Figure S3** Response–recovery characteristics of SnO<sub>2</sub>-400 to 5 ppm NO<sub>2</sub> at room temperature (20 °C).

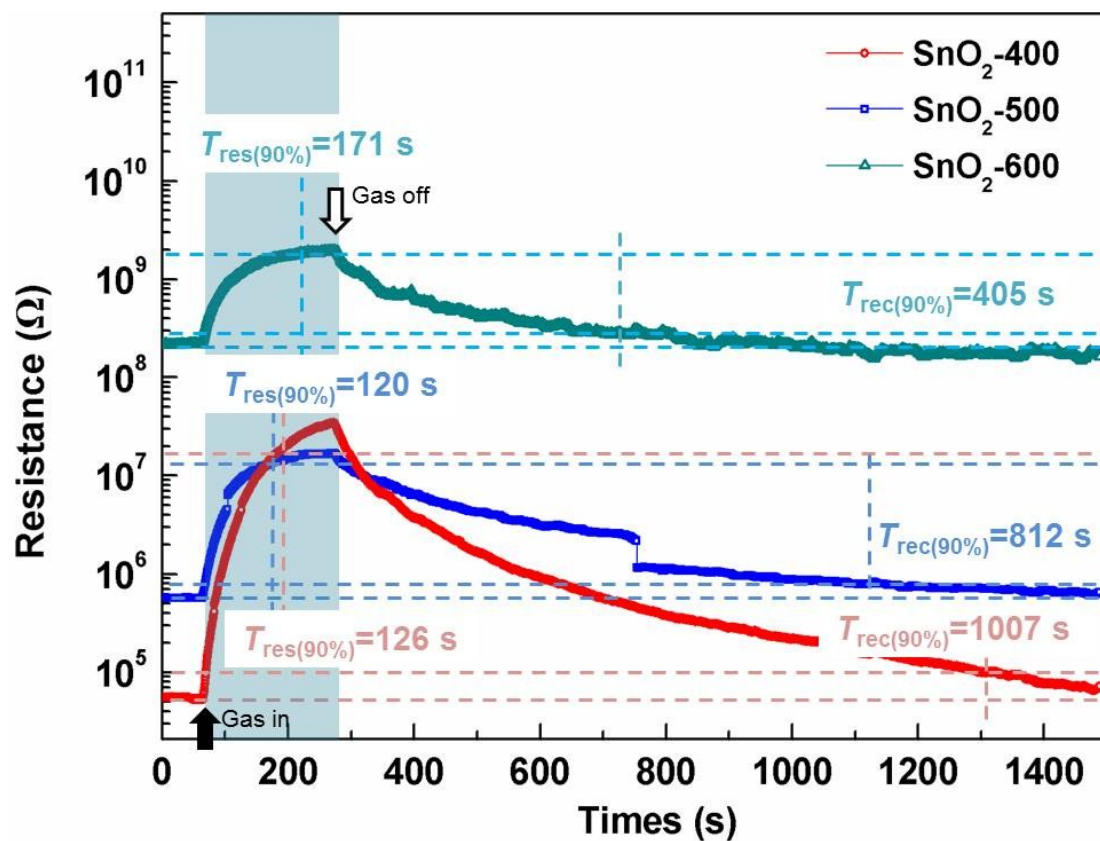

**Figure S4** response–recovery characteristics of SnO<sub>2</sub>-400, SnO<sub>2</sub>-500, and SnO<sub>2</sub>-600 to 5 ppm NO<sub>2</sub>.

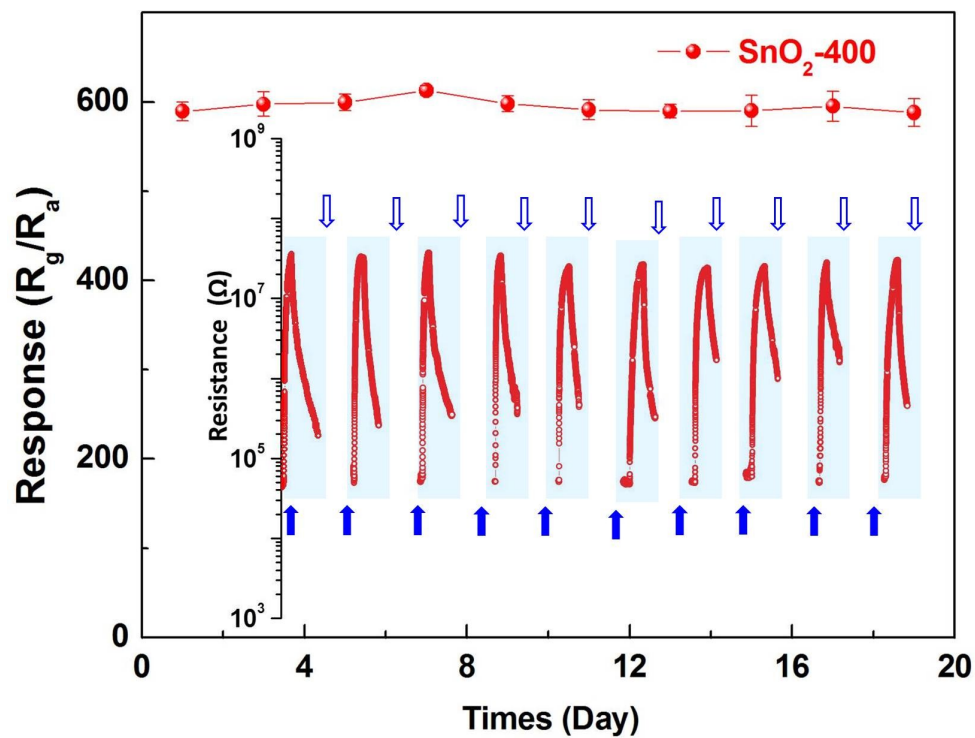

**Figure S5** Gas response of SnO<sub>2</sub>-400 towards 5 ppm NO<sub>2</sub> tested every two days for 10 days.

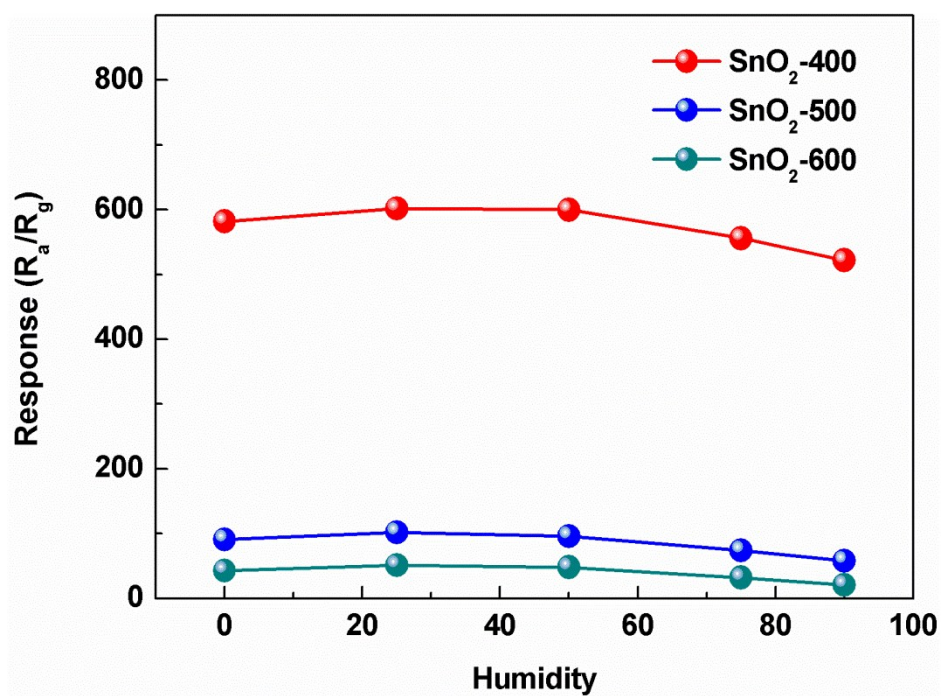

**Figure S6** Effect of ambient relative humidity on the response of the sensors based on SnO<sub>2</sub>-400, SnO<sub>2</sub>-500, and SnO<sub>2</sub>-600 to 5 ppm NO<sub>2</sub> at 50 °C.



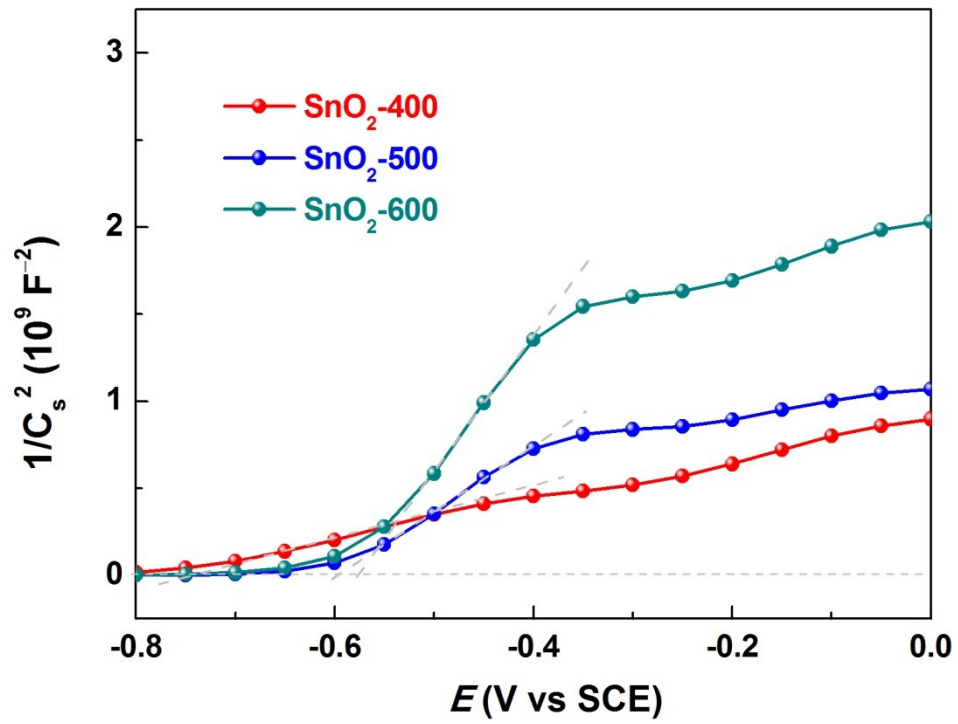

Figure S7 Mott-Schottky plots of SnO<sub>2</sub>-400, SnO<sub>2</sub>-500, and SnO<sub>2</sub>-600.

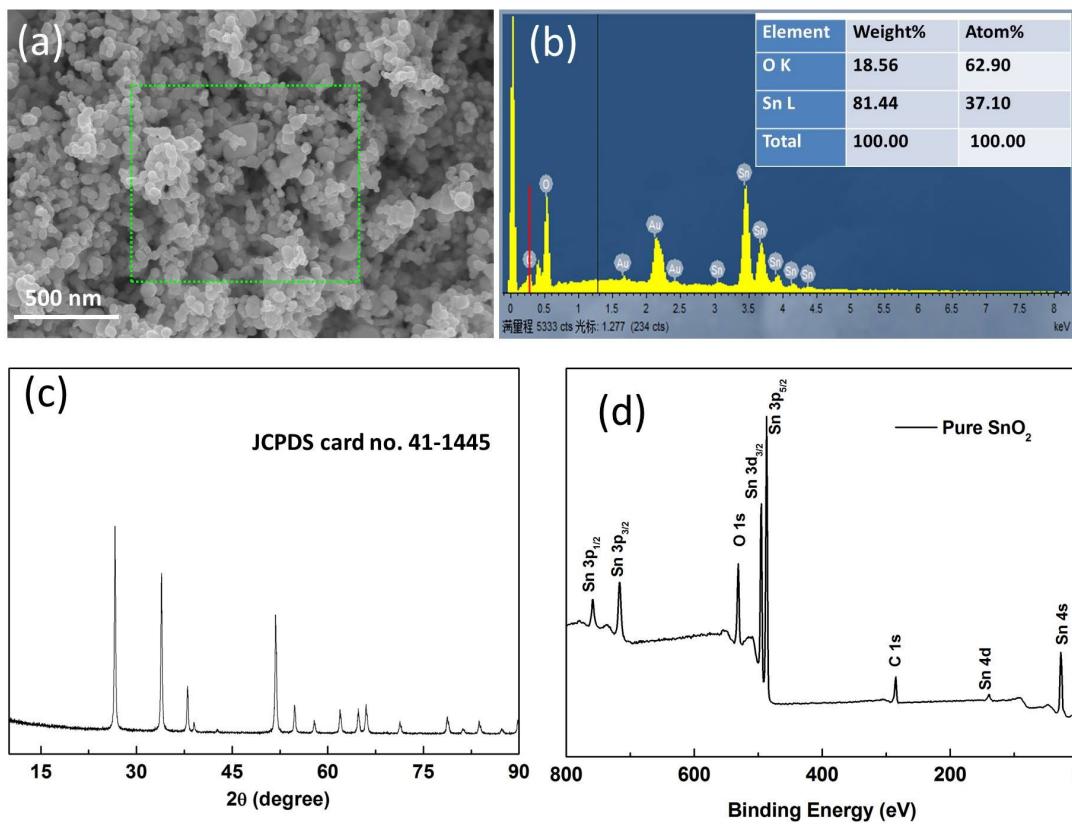

**Figure S8** (a) SEM image of pure SnO<sub>2</sub>; (b) EDX spectra; (c) XRD pattern; (d) XPS spectra of pure SnO<sub>2</sub>.

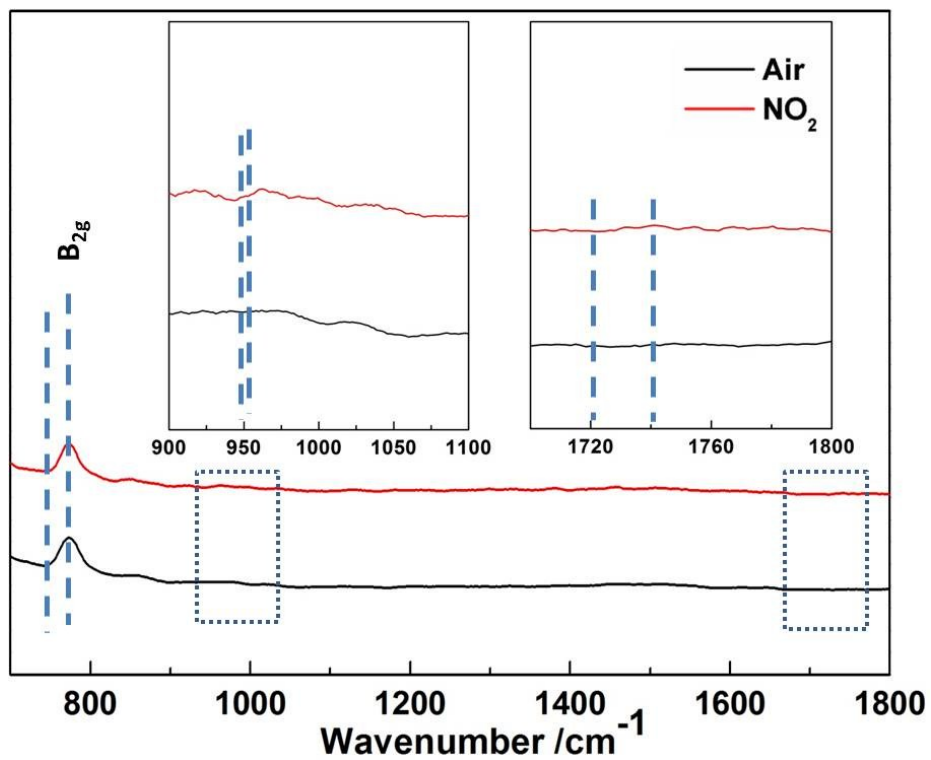

**Figure S9** In situ Raman spectra of pure SnO<sub>2</sub> upon exposure to air and 500 ppm NO<sub>2</sub> at 50 °C.

| Operation Temperature (°C) | Response Time (s) | Recovery Time (s) |
|----------------------------|-------------------|-------------------|
| 25                         | 242               | >1000             |
| 50                         | 126               | 1007              |
| 100                        | 109               | 159               |
| 150                        | 64                | 126               |
| 200                        | 62                | 121               |
| 250                        | 47                | 112               |
| 300                        | 20                | 62                |
| 350                        | 11                | 45                |

**Table S1.** The response and recovery times of SnO<sub>2</sub>-400 toward 5 ppm NO<sub>2</sub> at different operating temperature.
